# Supplementary material
Source: publisher figshare collection journal article supplement (https://acs.figshare.com/ndownloader/files/18678980)
Supplement: Supplementary file 1 [file 18678980]

Supporting Information for

## **Selective C-C Coupling in Carbon Dioxide Electroreduction via Efficient Spillover of Intermediates as Supported by Operando Raman Spectroscopy**

Jing Gao<sup>a,b</sup>, Hong Zhang<sup>b</sup>, Xueyi Guo<sup>a</sup>, Jingshan Luo<sup>b,c</sup>, Shaik M. Zakeeruddin<sup>b</sup>, Dan Ren<sup>b,\*</sup>, Michael Grätzel<sup>b,\*</sup>

*a. School of Metallurgy and Environment, Central South University, Changsha, 410083 Hunan, China*

*b. Laboratory of Photonics and Interfaces, École Polytechnique Fédérale de Lausanne, 1015 Lausanne, Switzerland*

*c Institute of Photoelectronic Thin Film Devices and Technology, Key Laboratory of Photoelectronic Thin Film Devices and Technology of Tianjin, College of Electronic Information and Optical Engineering, Nankai University, 300350 Tianjin, China*

\*Correspondence should be addressed to D.R. and M.G.: [dan.ren@epfl.ch](mailto:dan.ren@epfl.ch),  
[michael.graetzel@epfl.ch](mailto:michael.graetzel@epfl.ch)

### **Table of Contents**

|                                                                                                            |    |
|------------------------------------------------------------------------------------------------------------|----|
| S1. Additional characterizations of Cu(OH) <sub>2</sub> , Cu <sub>2</sub> O and Cu <sub>2</sub> O-Ag ..... | 1  |
| S2. Characterizations of oxide-derived Cu and CuAg catalysts .....                                         | 3  |
| S3. Electrochemical reduction of carbon dioxide on Cu and CuAg .....                                       | 7  |
| S4. Faradaic efficiency and partial current density for products .....                                     | 8  |
| S5. CO <sub>2</sub> reduction on Ag nanocorals .....                                                       | 14 |
| S6. CO <sub>2</sub> reduction on planar Cu <sub>2</sub> O-Ag .....                                         | 15 |
| S7. Raman spectroscopic studies on Ag .....                                                                | 17 |
| S8. SERS effect of Ag nanoparticles on Cu <sub>2</sub> O .....                                             | 18 |
| S9. Calculation of CO spillover efficiency .....                                                           | 20 |
| S10. CO <sub>2</sub> reduction on CuAu .....                                                               | 22 |
| S11 Solar-driven CO <sub>2</sub> reduction .....                                                           | 24 |
| S12. Supporting References .....                                                                           | 27 |

## S1. Additional characterizations of $\text{Cu}(\text{OH})_2$ , $\text{Cu}_2\text{O}$ and $\text{Cu}_2\text{O-Ag}$

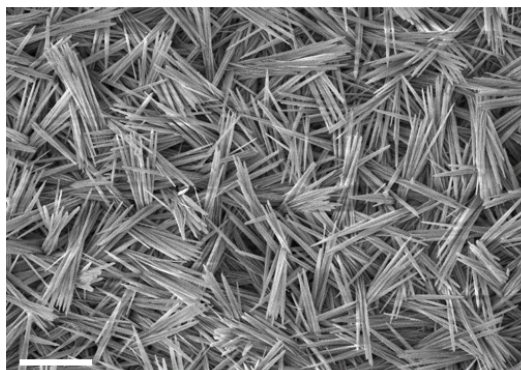

**Figure S1** Scanning electron micrograph of as-prepared  $\text{Cu}(\text{OH})_2$  nanowires. Scale bar: 4  $\mu\text{m}$ .

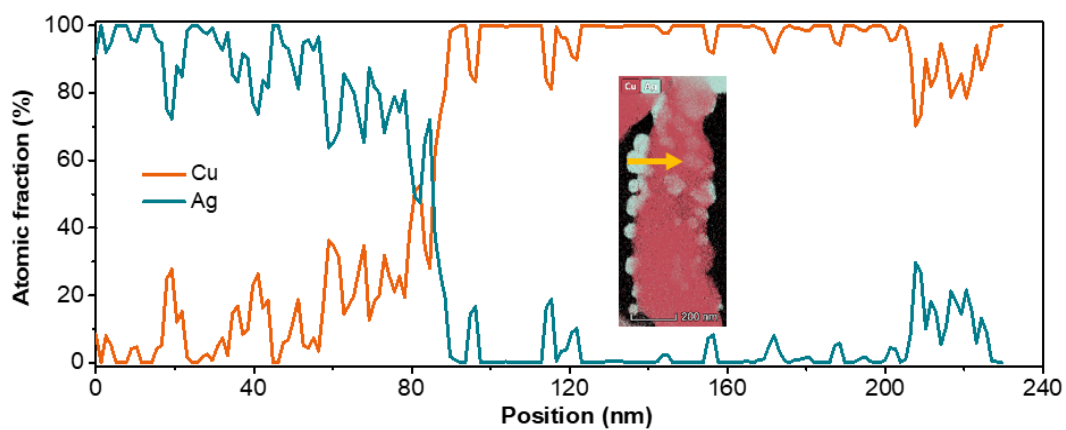

**Figure S2** The elemental profiling of Cu and Ag on a representative Ag- $\text{Cu}_2\text{O}$  nanowire (see insert) as a function of position. The arrow in inserted HAADF image shows the profiling direction.

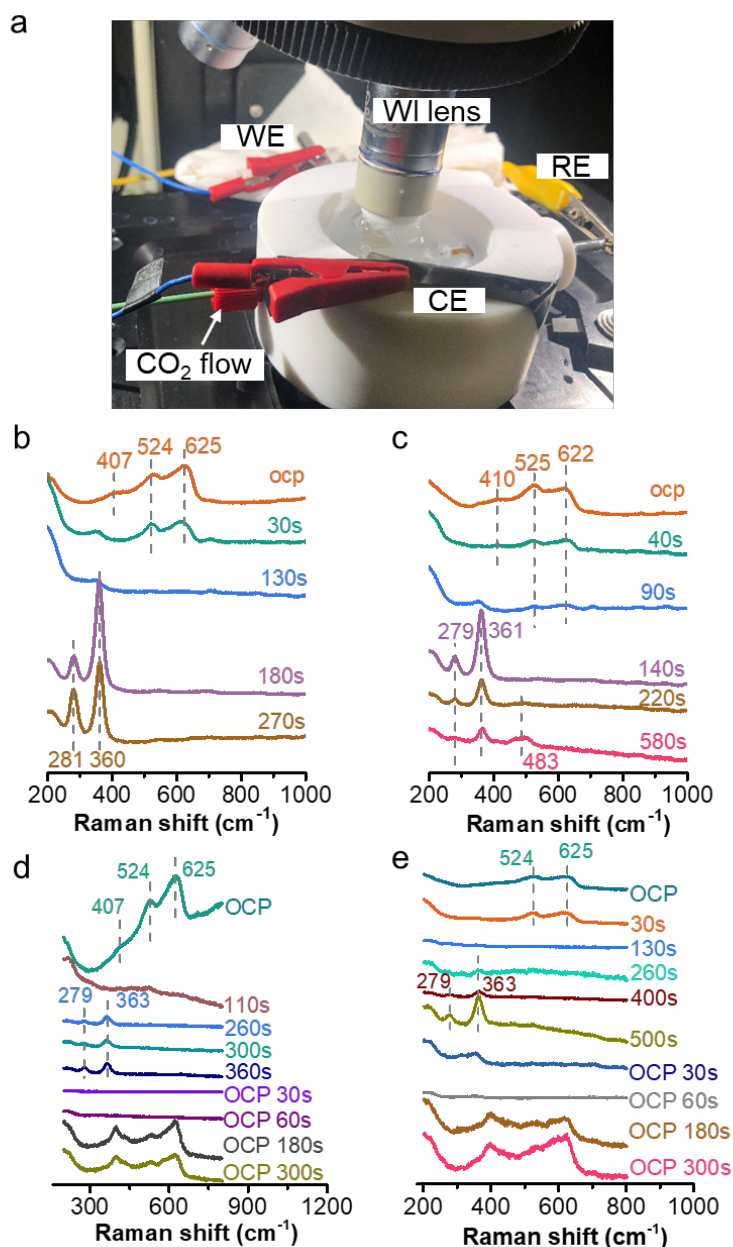

**Figure S3 (a)** A photograph of the custom-built electrochemical Teflon cell used for collecting operando Raman spectra during CO<sub>2</sub> reduction. CO<sub>2</sub> gas was continuously flowed through the cell during measurement. WE, CE, RE and WI lens refer to working electrode, counter electrode, reference electrode and water immersion lens, respectively. Operando Raman spectra of **(b, d)** Cu<sub>2</sub>O and **(c, e)** Cu<sub>2</sub>O-Ag during prerduction at -5 mA in 0.1 M KHCO<sub>3</sub>. A near-infrared laser (785 nm) was used as the excitation source. Raman peaks located at 407-410, 524-525 and 622-625 cm<sup>-1</sup> are assigned to the vibrations of Cu<sub>2</sub>O.

## S2. Characterizations of oxide-derived Cu and CuAg catalysts

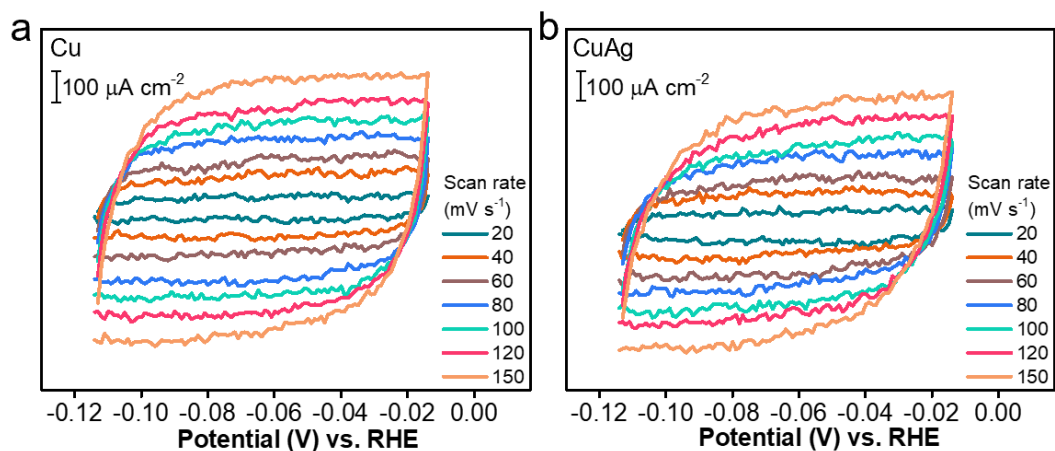

**Figure S4** Representative cyclic voltammograms within a non-faradaic potential range of **(a)** Cu and **(b)** CuAg at different scan rates from 20 to 150  $\text{mV s}^{-1}$  in Ar-saturated 0.1 M  $\text{KHCO}_3$ .

**Table S1** The roughness factors of Cu and CuAg catalysts estimated from double layer capacitance.

| Catalysts | Double layer capacitance ( $\text{mF cm}^{-2}$ ) | Roughness factor |
|-----------|--------------------------------------------------|------------------|
| Cu        | $3.40 \pm 0.44^a$                                | $113.3 \pm 14.7$ |
| CuAg      | $2.76 \pm 0.04$                                  | $92.0 \pm 1.3$   |

<sup>a</sup> The capacitance values of Cu and CuAg correspond to the average value of three independent measurements and the error bars are the standard deviations of these measurements.

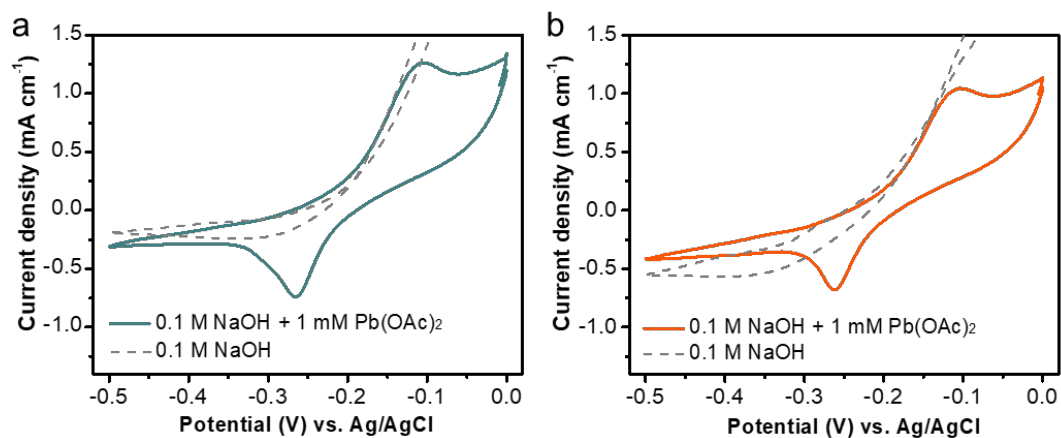

**Figure S5** Representative cyclic voltammograms of Pb underpotential deposition on **(a)** Cu and **(b)** CuAg in 0.1 M NaOH + 1 mM Pb(OAc)<sub>2</sub> (solid line) and 0.1 M NaOH (dash line). Scan rate was 10 mV s<sup>-1</sup>. The cathodic and anodic peaks observed at -0.27 V and -0.11 V correspond to the underpotential deposition of Pb and stripping of the Pb, respectively.

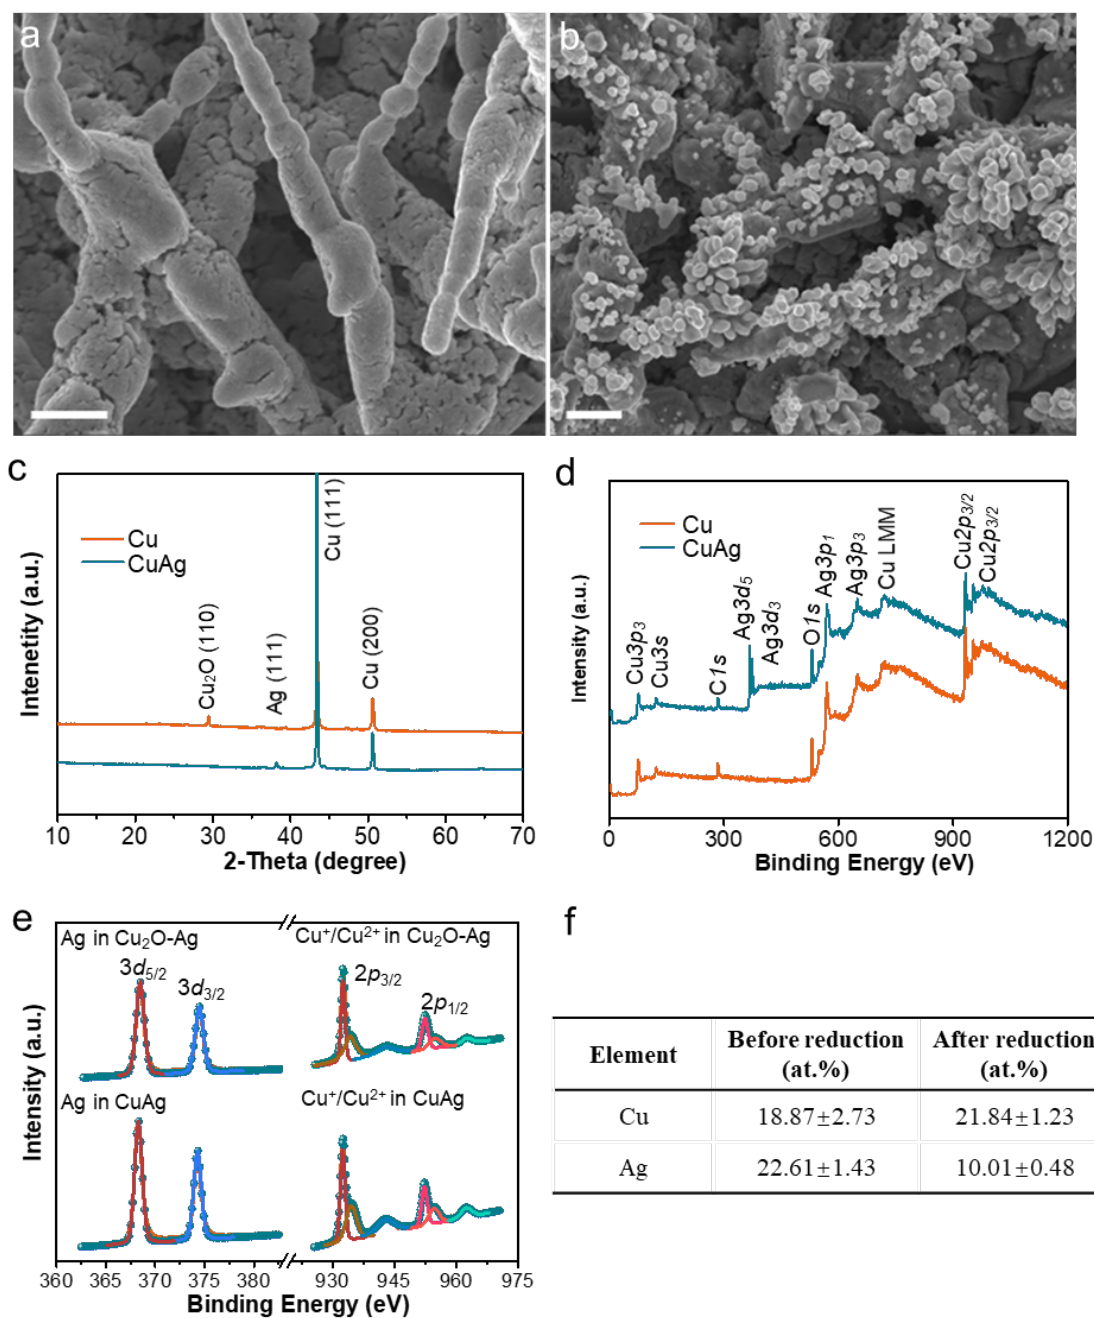

**Figure S6** Morphological and chemical characterizations of Cu and CuAg after 60-min electrolysis. SEM images of (a) Cu and (b) CuAg electrodes after 60-min CO<sub>2</sub> electroreduction at -1.05 V. (c) X-ray diffractograms, (d) XPS survey spectra, and (e) high-resolution XPS spectra of Cu2p and Ag3d after 60-min CO<sub>2</sub> electroreduction at -1.05 V. (f) Atomic percentage of Cu and Ag at the surface of CuAg catalyst before and after 60-min CO<sub>2</sub> reduction (the rest corresponds to the oxygen and carbon). Scale bar: 500 nm for (a) and (b).

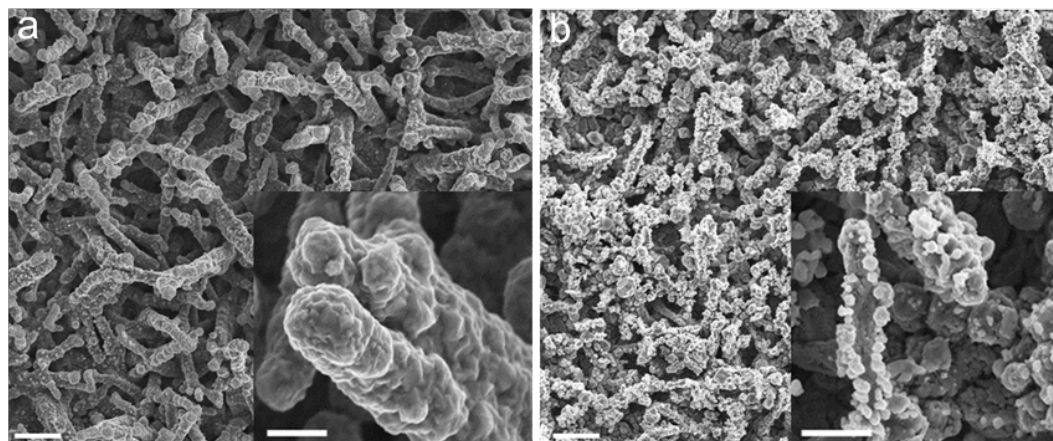

**Figure S7** Scanning electron micrographs of **(a)** Cu and **(b)** CuAg after 12 h stability test. Scale bars: 2  $\mu\text{m}$  for **(a)** and **(b)**, 500 nm for the inserts.



### S3. Electrochemical reduction of carbon dioxide on Cu and CuAg

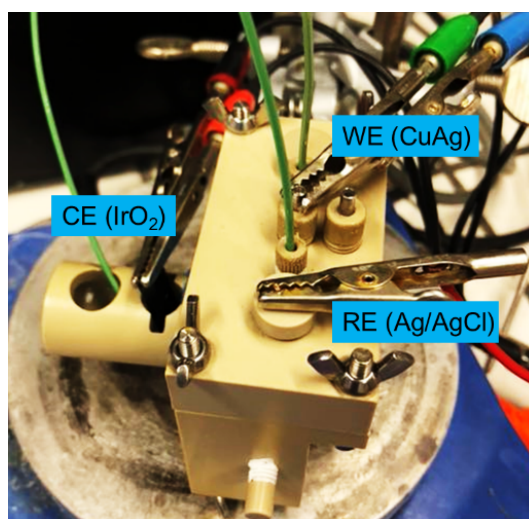

**Figure S8** A photograph of the electrochemical peek cell used for CO<sub>2</sub> reduction experiments in this work. The custom-built cell is separated into two compartments by an anion exchange membrane. The working electrode (WE) is held in the airtight cathodic compartment, with the reference electrode (RE) placed nearby. CO<sub>2</sub> gas is infused into the cathodic and anodic compartments at the same flow rate of 10 mL min<sup>-1</sup>.

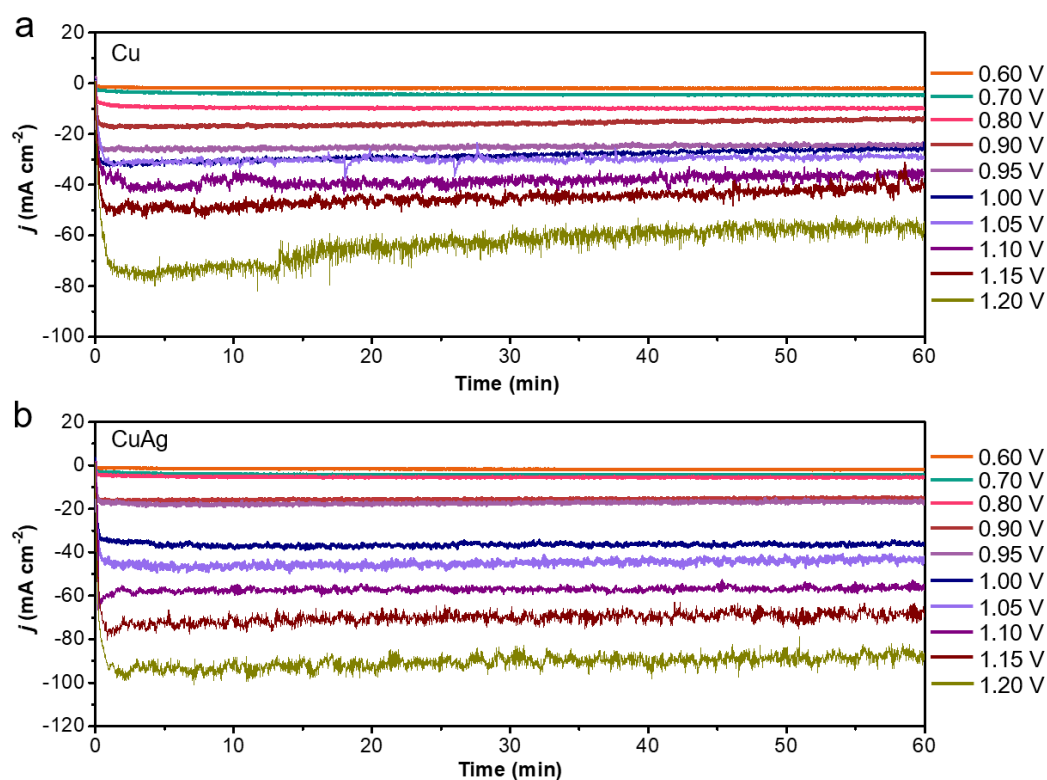

**Figure S9** Representative chronoamperograms of (a) Cu and (b) CuAg cathodes over 60-min electrolysis at different potentials.



## S4. Faradaic efficiency and partial current density for products

All the detected products during CO<sub>2</sub> reduction were expressed in terms of faradaic efficiency and partial current density. The FE of product  $X$  is defined as:

$$\text{FE}(X) = \frac{\text{number of electrons used for producing } X \text{ from CO}_2}{\text{total number of electrons for electrolysis}} \times 100\%$$

The partial current density of product  $X$  is defined as:

$$j(X) = \text{FE}(X) \times j_{\text{total}}$$

To give an example for the calculation of faradaic efficiency, we listed a representative set of data recorded on a CuAg catalyst at -1.05 V in Table S2.

**Table S2** Current and amounts of gaseous products recorded for five consecutive injections during 60-min electrolysis, and concentration of liquid products produced after the electrolysis.

| vial | time (s) | $j$ (mA) | amount (picomol) |       |                               | concentration ( $\mu\text{M}$ ) |                                  |                                  |                     |
|------|----------|----------|------------------|-------|-------------------------------|---------------------------------|----------------------------------|----------------------------------|---------------------|
|      |          |          | H <sub>2</sub>   | CO    | C <sub>2</sub> H <sub>4</sub> | HCOO <sup>-</sup>               | C <sub>2</sub> H <sub>5</sub> OH | C <sub>3</sub> H <sub>7</sub> OH | CH <sub>3</sub> COH |
| 1    | -        | -        | -                | -     | -                             |                                 |                                  |                                  |                     |
| 2    | 945      | -9.84    | 748.60           | 20.93 | 234.54                        |                                 |                                  |                                  |                     |
| 3    | 1790     | -9.69    | 798.77           | 24.09 | 244.37                        | 598.86                          | 675.00                           | 119.43                           | 33.75               |
| 4    | 2635     | -9.40    | 728.71           | 24.01 | 224.89                        |                                 |                                  |                                  |                     |
| 5    | 3480     | -9.47    | 726.66           | 28.71 | 219.22                        |                                 |                                  |                                  |                     |

### *Gaseous products*

The faradaic efficiency for each gaseous product is the average of the last four injections since the products in first injection were not equilibrated in the headspace. Here we calculate the faradaic efficiency of ethylene based on the data from vial 2 as an example.

12 electrons are required to form one ethylene molecule from two CO<sub>2</sub> molecules. Thus the number of electrons needed to get  $x$  (234.54) picomol of ethylene was:

$$n_{\text{ethylene}} = x \times N_A \times 12e = 234.53 \times 10^{-12} \text{ mol} \times 6.02 \times 10^{23} \text{ mol}^{-1} \times 12e = 1.69 \times 10^{15} e$$

The flow rate of the CO<sub>2</sub> was set as 10 cm<sup>3</sup> min<sup>-1</sup> ( $v_0$ ). The pressure difference between the gas inlet and atmosphere (1 atm = 14.7 psi) was recorded as 1.9 psi. Hence

the actual flow rate at the gas outlet was:

$$v = \frac{P_0 + \Delta P}{P_0} \times v_0 = \frac{(14.7 + 1.9) \text{ psi}}{14.7 \text{ psi}} \times 10 \text{ cm}^3 \text{ min}^{-1} = 11.29 \text{ cm}^3 \text{ min}^{-1}$$

Thus, the total time required to fill up the sample loop (10  $\mu\text{L}$ ) was:

$$t = \frac{V_0}{v} = \frac{0.01 \text{ cm}^3}{11.29 \text{ cm}^3 \text{ min}^{-1}} = 0.00089 \text{ min} = 0.053 \text{ s}$$

The total number of electrons passed during the sampling of vial 2 was:

$$n_{\text{total}} = \frac{I_0 \times t}{e} = \frac{9.84 \times 10^{-3} \text{ A} \times 0.053 \text{ s}}{1.602 \times 10^{-19} \text{ C e}^{-1}} = 3.26 \times 10^{15} \text{ e}$$

Thus, the faradaic efficiency of ethylene in vial 2 was:

$$\text{FE} = \frac{n_{\text{ethylene}}}{n_{\text{total}}} \times 100\% = \frac{1.69 \times 10^{15} \text{ e}}{3.26 \times 10^{15} \text{ e}} \times 100\% = 51.8\%$$

### *Liquid products*

Here we take the calculation of ethanol as an example. 12 electrons are required to form one ethanol molecule from two  $\text{CO}_2$  molecules. Thus, the number of electrons required to produce 675.00  $\mu\text{M}$  ( $c$ ) ethanol in 8 mL ( $V$ ) of catholyte was:

$$n_{\text{ethanol}} = c \times V \times N_A \times 12\text{e} = 675 \times 10^{-6} \text{ mol L}^{-1} \times 8 \times 10^{-3} \text{ L} \times 6.02 \times 10^{23} \text{ mol}^{-1} \times 12\text{e} = 3.90 \times 10^{19} \text{ e}$$

A total charge of 34.93 C ( $Q_0$ ) was passed through over 60-min electrolysis. Hence, the total number of electrons passed during  $\text{CO}_2$  reduction reaction was:

$$n_{\text{total}} = \frac{Q_0}{e} = \frac{34.93 \text{ C}}{1.602 \times 10^{-19} \text{ C e}^{-1}} = 2.18 \times 10^{20} \text{ e}$$

Thus, the faradaic efficiency of ethanol was:

$$\text{FE} = \frac{n_{\text{ethanol}}}{n_{\text{total}}} \times 100\% = \frac{3.90 \times 10^{19} \text{ e}}{2.18 \times 10^{20} \text{ e}} \times 100\% = 17.9\%$$

The sum of all FE values remained in the range of 90-105% (Table S5-S6), indicating that our experimental protocol is comprehensive and the instruments are well calibrated<sup>1</sup>.

**Table S3** Average current densities of products from CO<sub>2</sub> reduction on Cu<sub>2</sub>O derived Cu catalyst at different potentials.

| Potential<br>(V) vs. RHE | H <sub>2</sub> | CO   | CH <sub>4</sub> | HCOO <sup>-</sup> | C <sub>2</sub> H <sub>4</sub> | C <sub>2</sub> H <sub>5</sub> OH | CH <sub>3</sub> COO <sup>-</sup> | CH <sub>3</sub> COH | C <sub>3</sub> H <sub>7</sub> OH |
|--------------------------|----------------|------|-----------------|-------------------|-------------------------------|----------------------------------|----------------------------------|---------------------|----------------------------------|
| -0.60                    | 1.35           | 0.15 | -               | 0.71              | -                             | -                                | -                                | -                   | -                                |
| -0.70                    | 1.75           | 0.29 | -               | 1.76              | 0.07                          | -                                | -                                | -                   | -                                |
| -0.80                    | 4.59           | 0.47 | -               | 3.15              | 0.39                          | 0.08                             | -                                | -                   | 0.10                             |
| -0.90                    | 4.85           | 0.48 | -               | 4.44              | 1.37                          | 0.47                             | 0.05                             | -                   | 0.60                             |
| -0.95                    | 7.23           | 0.42 | 0.17            | 2.69              | 4.67                          | 1.73                             | 0.08                             | 0.11                | 1.59                             |
| -1.00                    | 7.98           | 0.29 | 0.70            | 2.54              | 8.36                          | 3.28                             | 0.12                             | 0.25                | 1.83                             |
| -1.05                    | 9.33           | 0.16 | 0.50            | 0.72              | 8.53                          | 4.64                             | 0.10                             | 0.16                | 1.77                             |
| -1.10                    | 14.08          | 0.18 | 2.02            | 0.54              | 8.98                          | 5.38                             | 0.07                             | 0.21                | 1.45                             |
| -1.15                    | 27.3           | 0.31 | 5.86            | 0.43              | 12.84                         | 5.74                             | 0.08                             | 0.25                | 1.43                             |
| -1.20                    | 42.13          | 0.21 | 8.88            | 0.55              | 7.83                          | 3.99                             | 0.11                             | 0.24                | 1.17                             |

**Table S4** Average current densities of products from CO<sub>2</sub> reduction on Cu<sub>2</sub>O derived CuAg catalyst at different potentials.

| Potential<br>(V) vs. RHE | H <sub>2</sub> | CO   | CH <sub>4</sub> | HCOO <sup>-</sup> | C <sub>2</sub> H <sub>4</sub> | C <sub>2</sub> H <sub>5</sub> OH | CH <sub>3</sub> COO <sup>-</sup> | CH <sub>3</sub> COH | C <sub>3</sub> H <sub>7</sub> OH |
|--------------------------|----------------|------|-----------------|-------------------|-------------------------------|----------------------------------|----------------------------------|---------------------|----------------------------------|
| -0.6                     | 1.01           | 0.18 | -               | 0.46              | 0.04                          |                                  |                                  | -                   | -                                |
| -0.7                     | 1.88           | 0.43 | -               | 1.16              | 0.03                          |                                  |                                  | -                   | -                                |
| -0.8                     | 2.63           | 0.70 | -               | 1.93              | 0.21                          | 0.13                             | -                                | -                   | 0.21                             |
| -0.9                     | 5.36           | 1.24 | -               | 2.30              | 1.71                          | 0.58                             | 0.07                             | 0.12                | 0.90                             |
| -0.95                    | 6.47           | 1.49 | -               | 1.55              | 4.39                          | 1.62                             | 0.11                             | 0.17                | 1.83                             |
| -1.0                     | 6.93           | 0.69 | -               | 1.42              | 9.59                          | 4.22                             | 0.13                             | 0.34                | 2.25                             |
| -1.05                    | 8.54           | 0.41 | -               | 0.92              | 18.07                         | 6.07                             | 0.11                             | 0.38                | 2.12                             |
| -1.1                     | 21.61          | 0.31 | 0.80            | 0.58              | 16.88                         | 6.37                             | 0.09                             | 0.25                | 1.64                             |
| -1.15                    | 31.85          | 0.42 | 3.30            | 0.53              | 17.09                         | 7.66                             | 0.12                             | 0.37                | 1.74                             |
| -1.2                     | 50.40          | 0.49 | 5.48            | 0.48              | 12.50                         | 6.30                             | 0.08                             | 0.31                | 1.23                             |

**Table S5** Average faradaic efficiencies of products from CO<sub>2</sub> reduction on Cu<sub>2</sub>O derived Cu catalyst at different potentials.

| Potential<br>(V) vs. RHE | H <sub>2</sub> | CO  | CH <sub>4</sub> | HCOO <sup>-</sup> | C <sub>2</sub> H <sub>4</sub> | C <sub>2</sub> H <sub>5</sub> OH | CH <sub>3</sub> COO <sup>-</sup> | CH <sub>3</sub> COH | C <sub>3</sub> H <sub>7</sub> OH | FE <sub>total</sub> | <i>j</i> <sub>total</sub> | <i>j</i> <sub>specific</sub> |
|--------------------------|----------------|-----|-----------------|-------------------|-------------------------------|----------------------------------|----------------------------------|---------------------|----------------------------------|---------------------|---------------------------|------------------------------|
| -0.6                     | 59.93          | .83 | -               | 32.97             | N.D.                          | N.D.                             | N.D.                             | N.D.                | N.D.                             | 99.73               | 2.23                      | 0.02                         |
| -0.7                     | 44.77          | .07 |                 | 43.77             | 1.80                          | N.D.                             | N.D.                             | N.D.                | N.D.                             | 97.41               | 3.95                      | 0.03                         |
| -0.8                     | 50.80          | .20 | N.D.            | 34.50             | 4.17                          | 0.93                             | N.D.                             | N.D.                | 1.20                             | 96.80               | 9.13                      | 0.08                         |
| -0.9                     | 38.43          | .60 | N.D.            | 33.83             | 10.80                         | 3.87                             | 0.35                             | 0.65                | 4.70                             | 96.23               | 12.85                     | 0.11                         |
| -0.95                    | 39.70          | .23 | 0.90            | 15.20             | 23.83                         | 8.63                             | 0.43                             | 0.53                | 8.17                             | 99.62               | 19.0                      | 0.17                         |
| -1                       | 31.33          | .13 | 2.50            | 9.50              | 33.20                         | 13.10                            | 0.43                             | 0.93                | 7.20                             | 99.32               | 25.47                     | 0.22                         |
| -1.05                    | 34.93          | .53 | 1.60            | 2.53              | 30.47                         | 16.43                            | 0.33                             | 0.75                | 5.43                             | 93.00               | 28.08                     | 0.25                         |
| -1.1                     | 41.97          | .50 | 5.47            | 1.53              | 25.47                         | 15.13                            | 0.20                             | 0.57                | 3.90                             | 94.74               | 35.20                     | 0.31                         |
| -1.15                    | 50.10          | .60 | 10.30           | 0.80              | 24.07                         | 10.57                            | 0.17                             | 0.43                | 2.60                             | 99.64               | 54.43                     | 0.48                         |
| -1.2                     | 60.03          | .37 | 12.37           | 0.80              | 12.13                         | 6.23                             | 0.30                             | 0.37                | 1.80                             | 94.40               | 68.94                     | 0.61                         |

The data is partially from Ref 1.

**Table S6** Average faradaic efficiencies of products from CO<sub>2</sub> reduction on Cu<sub>2</sub>O derived CuAg catalyst at different potentials.

| Potential<br>(V) vs. RHE | H <sub>2</sub> | CO    | CH <sub>4</sub>   | HCOO <sup>-</sup> | C <sub>2</sub> H <sub>4</sub> | C <sub>2</sub> H <sub>5</sub> OH | CH <sub>3</sub> COO <sup>-</sup> | CH <sub>3</sub> COH | C <sub>3</sub> H <sub>7</sub> OH | FE <sub>total</sub> | <i>j</i> <sub>total</sub> | <i>j</i> <sub>specific</sub> |
|--------------------------|----------------|-------|-------------------|-------------------|-------------------------------|----------------------------------|----------------------------------|---------------------|----------------------------------|---------------------|---------------------------|------------------------------|
| -0.6                     | 55.40          | 10.10 | N.D. <sup>a</sup> | 25.27             | 0.57                          | N.D.                             | N.D.                             | N.D.                | N.D.                             | 91.34               | 1.82                      | 0.02                         |
| -0.7                     | 51.40          | 11.47 | N.D.              | 31.77             | 0.93                          | N.D.                             | N.D.                             | N.D.                | N.D.                             | 95.57               | 3.69                      | 0.04                         |
| -0.8                     | 42.13          | 11.77 | N.D.              | 31.30             | 3.30                          | 2.23                             | N.D.                             | N.D.                | 3.47                             | 94.20               | 6.20                      | 0.07                         |
| -0.9                     | 41.40          | 10.23 | N.D.              | 18.47             | 12.93                         | 4.53                             | 0.53                             | 1.00                | 6.83                             | 95.92               | 12.66                     | 0.14                         |
| -0.95                    | 35.23          | 7.70  | N.D.              | 8.50              | 24.00                         | 8.80                             | 0.57                             | 0.90                | 9.80                             | 95.50               | 18.62                     | 0.20                         |
| -1                       | 24.40          | 2.23  | N.D.              | 4.90              | 34.03                         | 14.90                            | 0.43                             | 1.20                | 7.97                             | 90.06               | 28.58                     | 0.31                         |
| -1.05                    | 25.50          | 1.07  | N.D.              | 2.57              | 51.50                         | 17.50                            | 0.30                             | 1.00                | 5.63                             | 105.07              | 35.12                     | 0.38                         |
| -1.1                     | 45.13          | 0.63  | 1.67              | 1.23              | 35.33                         | 13.13                            | 0.25                             | 0.50                | 3.33                             | 101.20              | 48.04                     | 0.52                         |
| -1.15                    | 50.27          | 0.63  | 5.13              | 0.80              | 26.13                         | 11.73                            | 0.17                             | 0.57                | 2.67                             | 98.10               | 64.43                     | 0.70                         |
| -1.2                     | 62.90          | 0.63  | 7.03              | 0.63              | 15.70                         | 7.87                             | 0.10                             | 0.40                | 1.53                             | 96.79               | 80.29                     | 0.87                         |

**Table S7** The performances of Cu-based catalysts for the electroreduction of CO<sub>2</sub> to ethylene.

| Catalyst                                           | Electrolyte                          | Applied potential/current density | Performance towards ethylene formation |                                        |                                                 |
|----------------------------------------------------|--------------------------------------|-----------------------------------|----------------------------------------|----------------------------------------|-------------------------------------------------|
|                                                    |                                      |                                   | Faradaic efficiency (%)                | Current density (mA cm <sup>-2</sup> ) | Specific current density (mA cm <sup>-2</sup> ) |
| polycrystalline Cu <sup>2</sup>                    | 0.1 M KHCO <sub>3</sub>              | -1.41 V vs. NHE <sup>a</sup>      | 30.1                                   | -1.5                                   | -1.5                                            |
|                                                    | 0.1 M KClO <sub>4</sub>              | -1.40 V vs. NHE                   | 48.1                                   | -2.4                                   | -2.4                                            |
|                                                    | 0.1 M KCl                            | -1.44 V vs. NHE                   | 47.8                                   | -2.4                                   | -2.4                                            |
|                                                    | 0.1 M K <sub>2</sub> SO <sub>4</sub> | -1.40 V vs. NHE                   | 46.0                                   | -2.3                                   | -2.3                                            |
| Cu (100) <sup>3</sup>                              | 0.1 M KHCO <sub>3</sub>              | -1.40 V vs. SHE <sup>b</sup>      | 40.4                                   | -2.0                                   | -2.0                                            |
| Cu (911) <sup>3</sup>                              | 0.1 M KHCO <sub>3</sub>              | -1.36 V vs. SHE                   | 50.9                                   | -2.6                                   | -2.6                                            |
| Cu (711) <sup>3</sup>                              | 0.1 M KHCO <sub>3</sub>              | -1.34 V vs. SHE                   | 50.0                                   | -1.5                                   | -1.5                                            |
| Cu nanocrystals <sup>4</sup>                       | 0.1 M KHCO <sub>3</sub>              | -1.10 V vs. RHE                   | 41.1                                   | -1.2                                   | -1.7                                            |
| Cu nanoparticles<br>(using flow cell) <sup>5</sup> | 1 M KOH                              | -0.79 V vs. RHE                   | 45.6                                   | -138.0                                 | -115                                            |
| 1.7 μm Cu <sub>2</sub> O <sup>6</sup>              | 0.1 M KHCO <sub>3</sub>              | -0.99 V vs. RHE                   | 38.8                                   | -11.6                                  | -2.5                                            |
| Cu <sub>2</sub> O derived Cu <sup>7</sup>          | 0.1 M KHCO <sub>3</sub>              | -31.2 mA cm <sup>-2</sup>         | 42.6                                   | -13.3                                  | -0.1                                            |
| Ag@Cu <sup>8</sup>                                 | 0.1 M KHCO <sub>3</sub>              | -1.06 V vs. RHE                   | 28.6                                   | -1.1                                   | N.R.                                            |
| Cu/Ag <sup>9</sup>                                 | 0.2 M CsHCO <sub>3</sub>             | -1.0 V vs. RHE                    | 22.0                                   | ~-2.2                                  | N.R.                                            |
| Ag-Cu <sub>2</sub> O <sub>PS</sub> <sup>10</sup>   | 0.2 M KCl                            | -1.3 V vs. RHE                    | 11.0                                   | -0.3                                   | N.R.                                            |
| Ag-Cu <sub>2</sub> O <sub>PB</sub> <sup>10</sup>   | 0.2 M KCl                            | -1.2 V vs. RHE                    | 9.5                                    | -0.3                                   | N.R.                                            |
| CuAg wire<br>(using flow cell) <sup>11</sup>       | 1 M KOH                              | -0.7 V vs. RHE                    | 55.0                                   | -180.0                                 | -22.2                                           |
| CuAu <sup>12</sup>                                 | 0.1 M KHCO <sub>3</sub>              | -1.05 V vs. RHE                   | 38.7                                   | -16.6                                  | -1.7                                            |
| 7.9 μm CuBr <sup>13</sup>                          | 3 M KBr                              | -2.4 V vs. Ag/AgCl                | 79.5                                   | -36.0                                  | N.R. <sup>c</sup>                               |
| CuAg (this work)                                   | 0.1 M KHCO <sub>3</sub>              | -1.0 V vs. RHE                    | 51.5                                   | -18.1                                  | -1.6                                            |

<sup>a</sup> NHE: normal hydrogen electrode; <sup>b</sup> SHE: standard hydrogen electrode; <sup>c</sup> N.R.: not reported

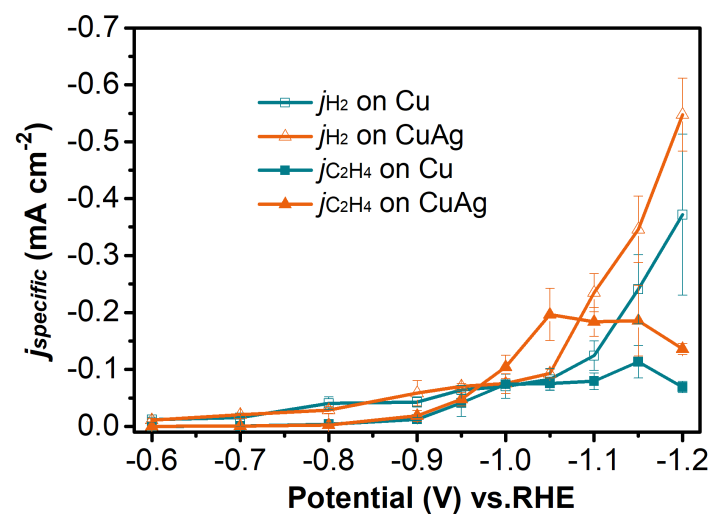

**Figure S10** Specific current densities of hydrogen ( $j_{H_2}$ ) and ethylene ( $j_{C_2H_4}$ ) as a function of applied potential on Cu and CuAg catalysts.

## S5. CO<sub>2</sub> reduction on Ag nanocorals

### *Preparation of Ag nanocorals*

1- $\mu$ m-thick Ag was sputtered onto etched FTO glass (DP650, Alliance-Concept), followed by anodization in 0.1 M Ar-saturated KCl solution (99.5% metal basis, Sigma Aldrich) at 0.4 V vs. RHE for 2 min to form a grey film<sup>14</sup>. The resulting film was then pre reduced in 0.1 M CO<sub>2</sub>-saturated KHCO<sub>3</sub> (99.99% metal base, Sigma Aldrich) solution at -1.8 V vs. RHE for 2 min.

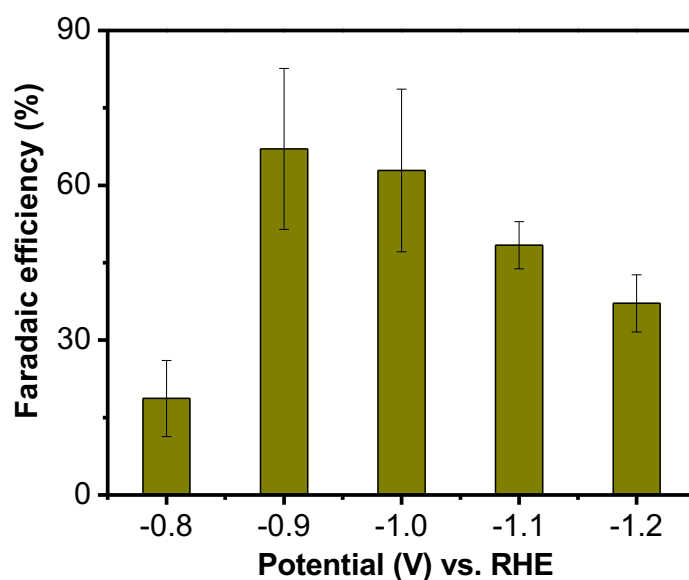

**Figure S11** Faradaic efficiency of CO as a function of applied potential on pure Ag nanocorals.



## S6. CO<sub>2</sub> reduction on planar Cu<sub>2</sub>O-Ag

### *Preparation of planar Ag-Cu<sub>2</sub>O*

Planar Cu<sub>2</sub>O was prepared by electrochemical deposition method adapted from a previous work<sup>6</sup>. Briefly, Cu film with thickness of 200 nm was sputtered on the surface of etched FTO (TEC-15  $\Omega$ ), which was used as the deposition substrate. Cu<sub>2</sub>O film was electrochemically deposited onto the substrate from 0.3 M CuSO<sub>4</sub> electrolyte containing 2.3 M lactic acid and 3.2 M NaOH, which was kept at 60 °C in a water bath. The deposition was carried out at a constant current density of -1.82 mA cm<sup>-2</sup> for 10 min. The resulting Cu<sub>2</sub>O film was then soaked into 10 mM AgNO<sub>3</sub> solution for 5 min to form planar Ag-Cu<sub>2</sub>O.

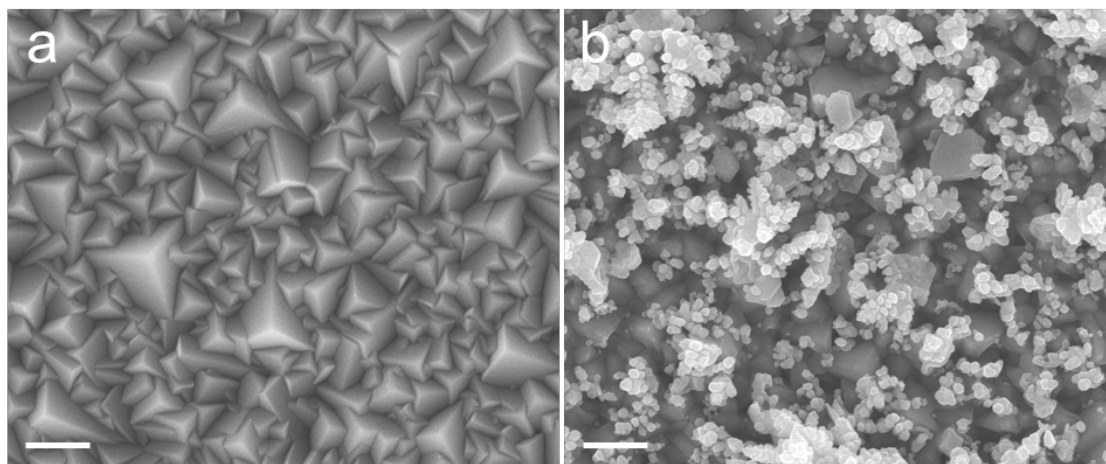

**Figure S12** Scanning electron micrographs of (a) electrodeposited Cu<sub>2</sub>O film and (b) exchanged Ag nanoparticles on Cu<sub>2</sub>O film. Scale bars: 500 nm for (a) and (b).

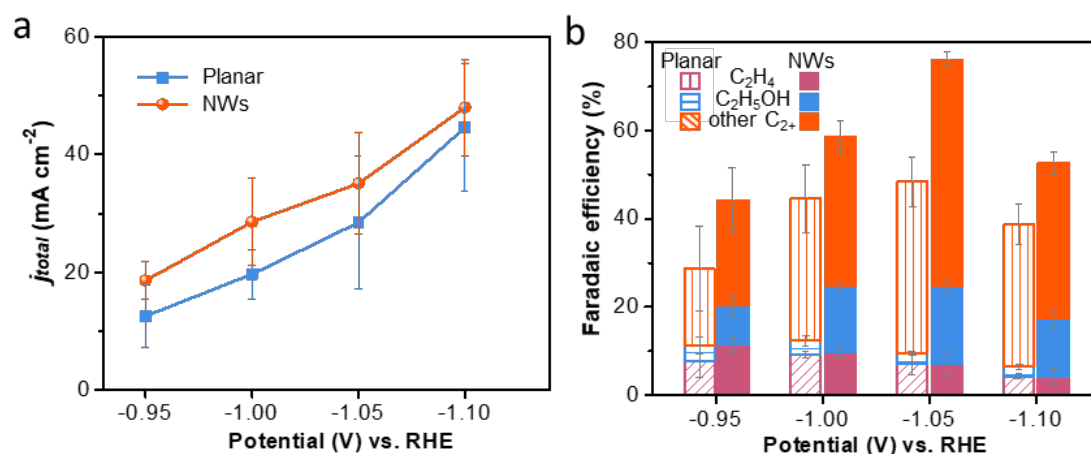

**Figure S13** Comparison of performance on planar  $\text{Cu}_2\text{O}$  and  $\text{Cu}_2\text{O}$  NWs derived  $\text{CuAg}$  catalysts. (a) Total current density as a function of applied potential on planar  $\text{Cu}_2\text{O}$  and  $\text{Cu}_2\text{O}$  NWs derived  $\text{CuAg}$  catalysts. (b) Faradaic efficiencies of ethylene, ethanol and other  $\text{C}_2^+$  products as a function of applied potential on planar  $\text{Cu}_2\text{O}$  and  $\text{Cu}_2\text{O}$  NWs derived  $\text{CuAg}$  catalysts.

## S7. Raman spectroscopic studies on Ag

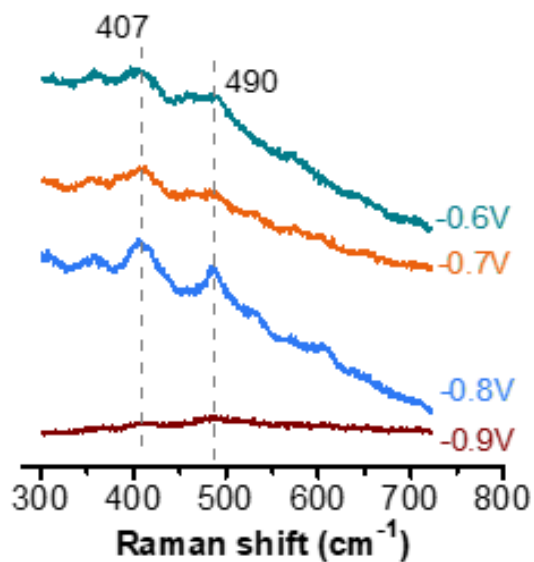

**Figure S14** Operando Raman spectra of pure Ag at different potentials in 0.1 M KHCO<sub>3</sub>. CO<sub>2</sub> was continuously flowed to the electrolyte and near-infrared laser (785 nm) was used as the excitation source. Raman peaks located at 407 and 490 cm<sup>-1</sup> correspond to the CO vibration on Ag surface.

## S8. SERS effect of Ag nanoparticles on Cu<sub>2</sub>O

### *Preparation of Cu<sub>2</sub>O on SERS substrate*

1- $\mu$ m-thick Ag was sputtered onto etched FTO glass (DP650, Alliance-Concept), followed by roughening in 0.1 M HCl (36%, ABCR) *via* cyclic voltammetry from -0.3 V to 0.2 V vs. Ag/AgCl. The prepared Ag nanoparticles was rinsed with DI water and dried by compressed air. Cu<sub>2</sub>O was electrodeposited on the Ag surface using the same method as described above., except that the deposition time was 30 s.

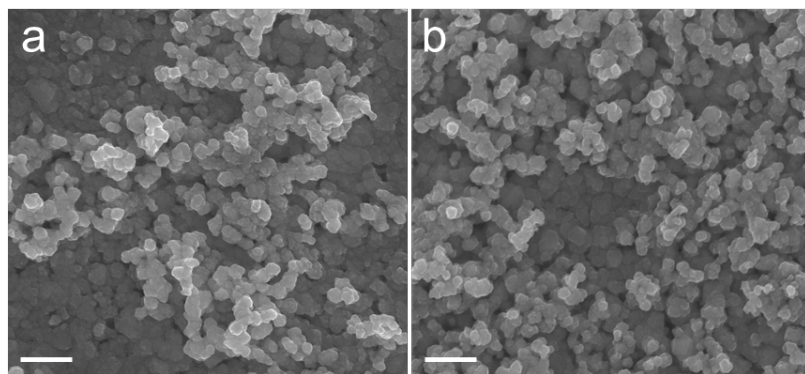

**Figure S15** Scanning electron micrographs of **(a)** electrochemically-roughened Ag substrate and **(b)** electrodeposited Cu<sub>2</sub>O on Ag substrate. Scale bars: 500 nm for **(a)** and **(b)**.

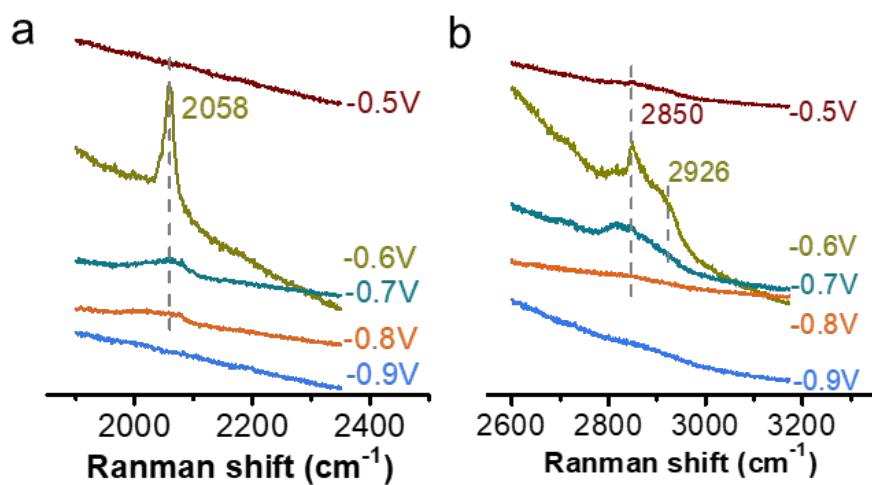

**Figure S16** Operando Raman spectra of oxide-derived Cu onto a classic Ag SERS substrate.  $\text{CO}_2$  was continuously flowed to 0.1 M  $\text{KHCO}_3$  electrolyte and near-infrared laser (785 nm) was used as the excitation source. Raman peaks located at 2058 and 2850-2926  $\text{cm}^{-1}$  correspond to the respective  $\text{C}\equiv\text{O}$  stretching and C-H vibration on Cu surface.

## S9. Calculation of CO spillover efficiency

### *Calculation of turnover frequency (TOF)*

The total production rate of CO ( $TOF_{CO}$ ) was calculated against the specific surface area to analyze the efficiency of CO spillover on bimetallic catalysts. Generally, the produced CO from CO<sub>2</sub> electrochemical reduction exists in two forms: intermediated \*CO and gaseous CO. The relationship between three terms is:

$$TOF_{CO} = TOF_{*CO} + TOF_{CO(g)}$$

We assume that all the hydrocarbons and oxygenates originate from \*CO intermediates. Therefore, the production rate of \*CO intermediates ( $TOF_{*CO}$ ) can be calculated by equivalently converting the production rates of all the carbonaceous products via the following equation:

$$TOF_{*CO} = TOF_{CH_4} + 2TOF_{C_2H_4} + 2TOF_{C_2H_5OH} + 2TOF_{CH_3COO^-} + 2TOF_{CH_3COH} + 3TOF_{C_3H_7OH}$$

The difference of  $TOF_{CO}$  between Cu and CuAg is calculated to be the amount of CO produced on Ag active sites, defined here as  $\Delta TOF_{CO}$ . The efficiency of CO spillover is thus expressed in the following equation:

$$\text{CO spillover efficiency} = \frac{\Delta TOF_{*CO}}{\Delta TOF_{CO}} = 1 - \frac{\Delta TOF_{CO(g)}}{\Delta TOF_{CO}}$$

It is noted that CO spillover only takes place at potentials <-1.0 V and is not applicable to more positive potentials.

**Table S8** Calculated TOF values on Cu and CuAg with respect to specific surface area. CO spillover is supposed to take place only at potentials that are <-1.0 V.

| Potential<br>(V) vs.<br>RHE | TOF <sub>CO</sub> on Cu<br>(nmol s <sup>-1</sup> cm <sup>-2</sup> ) | Standard<br>error | TOF <sub>CO</sub> on CuAg<br>(nmol s <sup>-1</sup> cm <sup>-2</sup> ) | Standard<br>error | TOF <sub>CO(g)</sub> on Cu<br>(nmol s <sup>-1</sup> cm <sup>-2</sup> ) | Standard<br>error | TOF <sub>CO(g)</sub> on<br>CuAg<br>(nmol s <sup>-1</sup> cm <sup>-2</sup> ) | Standard<br>error | CO spillover<br>efficiency | Propagated<br>error |
|-----------------------------|---------------------------------------------------------------------|-------------------|-----------------------------------------------------------------------|-------------------|------------------------------------------------------------------------|-------------------|-----------------------------------------------------------------------------|-------------------|----------------------------|---------------------|
| -0.6                        | 0.71                                                                | 0.26              | 1.03                                                                  | 0.17              | 0.71                                                                   | 0.24              | 1.03                                                                        | 0.17              |                            |                     |
| -0.7                        | 1.41                                                                | 0.44              | 2.50                                                                  | 0.51              | 1.32                                                                   | 0.42              | 2.39                                                                        | 0.51              |                            |                     |
| -0.8                        | 2.91                                                                | 1.06              | 4.67                                                                  | 0.96              | 2.12                                                                   | 0.79              | 4.02                                                                        | 1.20              |                            |                     |
| -0.9                        | 5.38                                                                | 0.97              | 12.07                                                                 | 0.39              | 2.21                                                                   | 1.06              | 6.96                                                                        | 1.74              |                            |                     |
| -0.95                       | 14.56                                                               | 7.06              | 23.80                                                                 | 5.87              | 1.94                                                                   | 1.15              | 8.37                                                                        | 5.98              |                            |                     |
| -1.0                        | 22.77                                                               | 1.59              | 35.22                                                                 | 8.91              | 1.32                                                                   | 0.50              | 3.91                                                                        | 2.61              | 0.79                       | 0.26                |
| -1.05                       | 24.18                                                               | 6.35              | 52.61                                                                 | 15.33             | 0.73                                                                   | 0.55              | 2.28                                                                        | 1.74              | 0.95                       | 0.07                |
| -1.1                        | 27.80                                                               | 7.94              | 50.43                                                                 | 9.67              | 0.85                                                                   | 0.57              | 1.74                                                                        | 0.73              | 0.96                       | 0.05                |
| -1.15                       | 39.19                                                               | 10.06             | 57.72                                                                 | 15.76             | 1.36                                                                   | 0.97              | 2.28                                                                        | 0.66              | 0.95                       | 0.08                |
| -1.2                        | 31.77                                                               | 4.32              | 48.70                                                                 | 2.28              | 1.06                                                                   | 0.65              | 2.83                                                                        | 0.67              | 0.90                       | 0.06                |



## S10. CO<sub>2</sub> reduction on CuAu

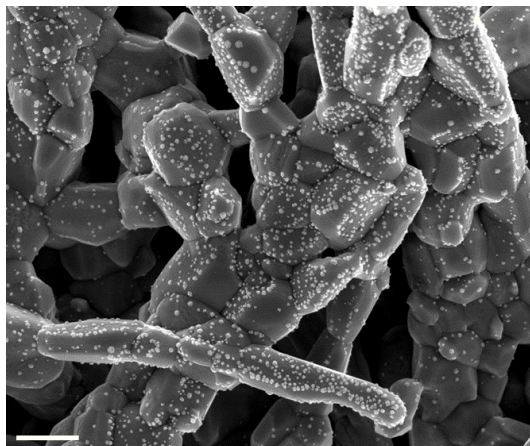

**Figure S17** Scanning electron micrograph of Cu<sub>2</sub>O-Au by driving galvanic replacement reaction between Cu<sub>2</sub>O and HAuCl<sub>4</sub> (0.2 mM) for 1 min. Scale bar: 500 nm.

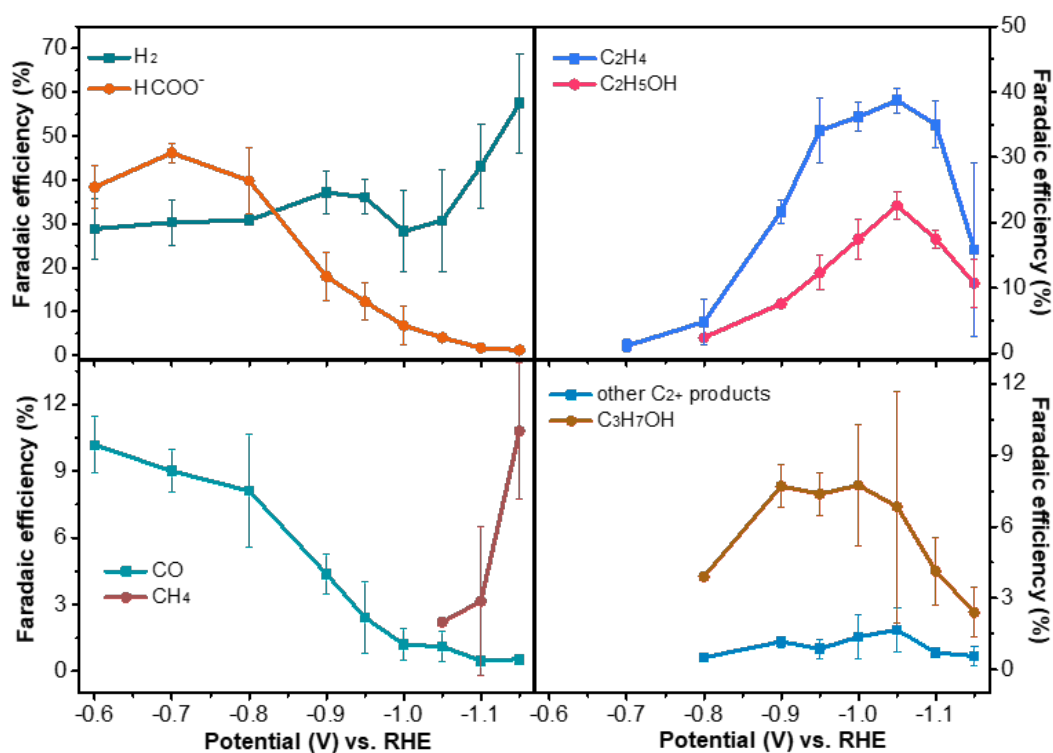

**Figure S18** Faradaic efficiency for representative products on CuAu catalyst as a function of potential.

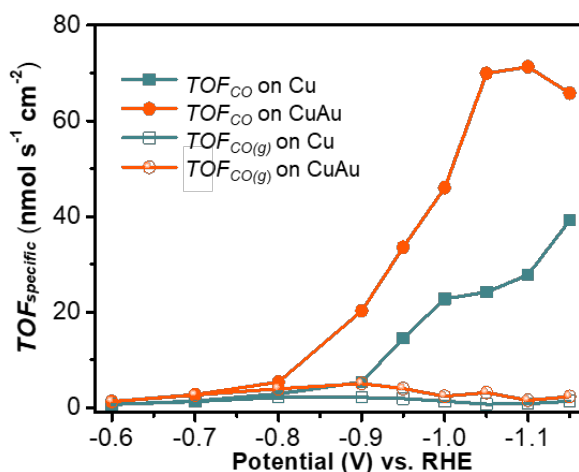

**Figure S19** Production rates of total CO (including \*CO intermediates and gaseous CO) and gaseous CO as a function of the applied potential on Cu and CuAu catalysts.

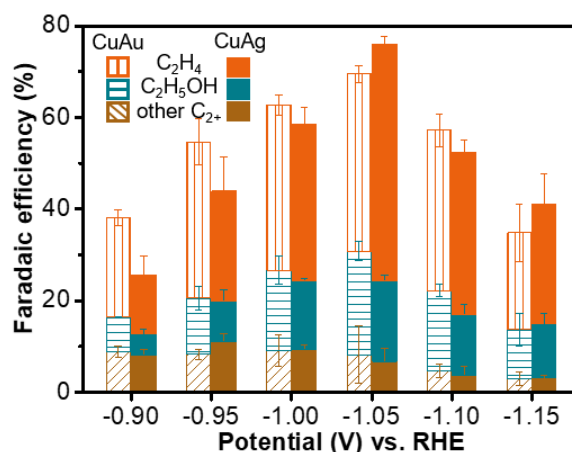

**Figure S20** Average faradaic efficiencies of ethylene, ethanol and other C<sub>2+</sub> products on CuAu (hollow) and CuAg (solid) catalysts. Data is obtained from Supporting Reference 12.

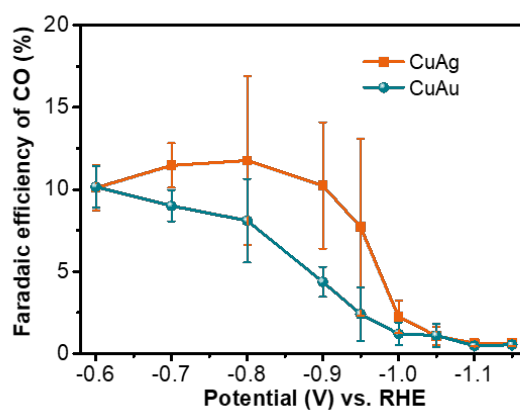

**Figure S21** Faradaic efficiency of CO as a function of applied potential on CuAg and CuAu catalysts. Data is obtained from Supporting Reference 12.

## S11 Solar-driven CO<sub>2</sub> reduction

### *Calculation of solar-to-fuel (STF) conversion efficiency*

The STF conversion efficiency can be determined directly by the multiplier of electricity to fuel (ETF) output and solar to electricity (STE) input. For the CO<sub>2</sub> reduction system, STE and ETF conversion efficiency can be calculated respectively:

$$\eta_{STE} = \frac{\text{electrical power output}}{\text{solar illumination input}} = \frac{j_{op} V_{op}}{P_s}$$

$$\eta_{ETF} = \frac{\text{fuel power output}}{\text{electrical power input}} = \frac{j_{op} E_{fuel} FE_{fuel}}{j_{op} V_{op}}$$

Where  $j_{op}$  and  $V_{op}$  are the operating current and voltage of the combined system,  $P_s$  is the solar illumination input power,  $E_{fuel}$  is the thermodynamic equilibrium potential between the two half-reactions under standard condition and  $FE_{fuel}$  is the faradaic efficiency of the product. Thus, STF conversion efficiency can be calculated:

$$\eta_{STF} = \frac{\eta_{ETF}}{\eta_{STE}} = \frac{j_{op} E_{fuel} FE_{fuel}}{P_s}$$

An example of solar to ethylene conversion efficiency calculation is given here. The operating current density (normalized to the effective illuminated area of the solar cells) of the solar driven CO<sub>2</sub> reduction system is 6.68 mA cm<sup>-2</sup>. The equilibrium cell potential for ethylene formation is 1.15 V. The average faradaic efficiency for ethylene formation was 54.26% during 1 h solar driven CO<sub>2</sub> reduction. The solar-to-ethylene conversion efficiency is calculated as:

$$\eta_{solar-to-ethylene} = \frac{6.68 \text{ mA cm}^{-2} \times 1.15 \text{ V} \times 54.26\%}{100 \text{ mW cm}^{-2}} = 4.17\%$$

**Table S9** A summary of photovoltaic-driven electrochemical CO<sub>2</sub> reduction system from carbon dioxide and water.

| Photovoltaic          | Cathode                      | Anode            | Electrolyte                                                                                               | Anolyte                               | Major product                                                | Solar-to-fuel efficiency (%) | Ref.      |
|-----------------------|------------------------------|------------------|-----------------------------------------------------------------------------------------------------------|---------------------------------------|--------------------------------------------------------------|------------------------------|-----------|
| GaInP/GaInAs/Ge       | CuO + SnO <sub>2</sub>       | IrO <sub>2</sub> | 0.1 M CsHCO <sub>3</sub>                                                                                  | 0.25 CsOH                             | CO                                                           | 13.4                         | 15        |
| Perovskite solar cell | Au                           | IrO <sub>2</sub> | 0.5 M NaHCO <sub>3</sub>                                                                                  | -                                     | CO                                                           | 6.5                          | 16        |
| Si                    | WSe <sub>2</sub>             | Co               | 50% EMIM-BF <sub>4</sub> in water                                                                         | 0.26 mM K <sup>+</sup>                | CO                                                           | 4.6                          | 17        |
| GaAs/InGaP/Si         | Pd/C coated Ti               | Ni               | 2.8 M KHCO <sub>3</sub>                                                                                   | 1 M KOH                               | HCOOH                                                        | 10.0                         | 18        |
| SiGe                  | Ru complex polymer           | IrO <sub>x</sub> | 0.1 M potassium phosphate buffer (K <sub>2</sub> HPO <sub>4</sub> :KH <sub>2</sub> PO <sub>4</sub> = 1:1) | -                                     | HCOOH                                                        | 4.6                          | 19        |
| Si                    | Cu <sub>2</sub> O derived Cu | IrO <sub>x</sub> | 0.2 M KHCO <sub>3</sub>                                                                                   | -                                     | C <sub>2</sub> H <sub>4</sub>                                | 1.5                          | 20        |
| III-V/Si              | CuAg                         | IrO <sub>2</sub> | 0.2 M CsHCO <sub>3</sub>                                                                                  | 0.2 M CsHCO <sub>3</sub>              | C <sub>2</sub> H <sub>4</sub>                                | 1.7                          | 9         |
| Perovskite solar cell | CuO                          | CuO              | 0.1 M CsHCO <sub>3</sub>                                                                                  | 0.2 M Cs <sub>2</sub> CO <sub>3</sub> | C <sub>2</sub> H <sub>4</sub> +C <sub>2</sub> H <sub>6</sub> | 2.3                          | 21        |
| Perovskite solar cell | CuAg                         | IrO <sub>2</sub> | 0.2 M KHCO <sub>3</sub>                                                                                   | -                                     | C <sub>2</sub> H <sub>4</sub>                                | 4.2                          | this work |

**Table S10** Faradaic efficiencies of products obtained from CO<sub>2</sub> reduction on Cu<sub>2</sub>O derived CuAg catalyst at different current densities in two-electrode configuration.

| Current density<br>(mA cm <sup>-2</sup> ) | H <sub>2</sub> | CO   | HCOO <sup>-</sup> | C <sub>2</sub> H <sub>4</sub> | C <sub>2</sub> H <sub>5</sub> OH | C <sub>3</sub> H <sub>7</sub> OH | FE <sub>total</sub> |
|-------------------------------------------|----------------|------|-------------------|-------------------------------|----------------------------------|----------------------------------|---------------------|
| 30.30                                     | 21.66          | 3.05 | 7.0               | 35.48                         | 22.1                             | 4.20                             | 93.5                |
| 35.29                                     | 26.09          | 1.30 | 7.6               | 42.41                         | 7.3                              | 0.9                              | 85.6                |
| 40.70                                     | 32.82          | 0.80 | 4.18              | 52.94                         | 11.3                             | 2.3                              | 104.9               |
| 43.38                                     | 32.80          | 0.76 | 5.1               | 51.92                         | 10.6                             | 2.7                              | 103.9               |
| 46.84                                     | 37.00          | 0.59 | 7.1               | 49.98                         | 7.40                             | 2.1                              | 104.2               |
| 52.30                                     | 27.76          | 0.44 | 2.30              | 50.74                         | 12.50                            | 2.20                             | 96.0                |
| 56.94                                     | 28.68          | 0.89 | 2.9               | 52.26                         | 7.80                             | 3.10                             | 92.0                |

**Table S11** Overall reaction for the major products and the respective energy efficiency of solar-driven electrolyzer system.

| Reduction product  | Overall reaction                                                                                           | Equilibrium potential<br>(V) | Faradaic efficiency<br>(%) | Solar to fuel conversion<br>efficiency (%) |
|--------------------|------------------------------------------------------------------------------------------------------------|------------------------------|----------------------------|--------------------------------------------|
| hydrogen           | 2H <sub>2</sub> O → 2H <sub>2</sub> + O <sub>2</sub>                                                       | 1.23                         | 22.6                       | 1.86                                       |
| carbon monoxide    | 2CO <sub>2</sub> → 2CO + O <sub>2</sub>                                                                    | 1.33                         | 0.66                       | 0.06                                       |
| formate            | 2CO <sub>2</sub> + 2H <sub>2</sub> O → 2HCOO <sup>-</sup> + 2H <sup>+</sup> + O <sub>2</sub>               | 1.46                         | 3.70                       | 0.31                                       |
| acetate            | 2CO <sub>2</sub> + 2H <sub>2</sub> O → CH <sub>3</sub> COO <sup>-</sup> + H <sup>+</sup> + 2O <sub>2</sub> | 1.15                         | 0.30                       | 0.03                                       |
| ethylene           | 2CO <sub>2</sub> + 2H <sub>2</sub> O → C <sub>2</sub> H <sub>4</sub> + 3O <sub>2</sub>                     | 1.15                         | 54.26                      | 4.17                                       |
| ethanol            | 2CO <sub>2</sub> + 3H <sub>2</sub> O → C <sub>2</sub> H <sub>5</sub> OH + 3O <sub>2</sub>                  | 1.14                         | 13.10                      | 1.00                                       |
| <i>n</i> -propanol | 6CO <sub>2</sub> + 8H <sub>2</sub> O → 2C <sub>3</sub> H <sub>7</sub> OH + 9O <sub>2</sub>                 | 1.02                         | 3.70                       | 0.25                                       |
| acetone            | 3CO <sub>2</sub> + 3H <sub>2</sub> O → CH <sub>3</sub> COCH <sub>3</sub> + 4O <sub>2</sub>                 | 1.37                         | 1.10                       | 0.10                                       |

## S12. Supporting References

1. Hori, Y., Electrochemical CO<sub>2</sub> Reduction on Metal Electrodes. In *Modern Aspects of Electrochemistry*, Vayenas, C. G.; White, R. E.; Gamboa-Aldeco, M. E., Eds. Springer New York: 2008; Vol. 42, pp 89-189.
2. Hori, Y.; Murata, A.; Takahashi, R., Formation of Hydrocarbons in the Electrochemical Reduction of Carbon Dioxide at a Copper Electrode in Aqueous Solution. *J. Chem. Soc., Faraday Trans. 1* **1989**, 85 (8), 2309-2326.
3. Hori, Y.; Takahashi, I.; Koga, O.; Hoshi, N., Electrochemical Reduction of Carbon Dioxide at Various Series of Copper Single Crystal Electrodes. *J. Mol. Catal. A: Chem.* **2003**, 199 (1-2), 39-47.
4. Loiudice, A.; Lobaccaro, P.; Kamali, E. A.; Thao, T.; Huang, B. H.; Ager, J. W.; Buonsanti, R., Tailoring Copper Nanocrystals towards C<sub>2</sub> Products in Electrochemical CO<sub>2</sub> Reduction. *Angew. Chem. Int. Ed.* **2016**, 55 (19), 5789-5792.
5. Ma, S.; Sadakiyo, M.; Luo, R.; Heima, M.; Yamauchi, M.; Kenis, P. J. A., One-step electrosynthesis of ethylene and ethanol from CO<sub>2</sub> in an alkaline electrolyzer. *J. Power Sources* **2016**, 301, 219-228.
6. Ren, D.; Deng, Y.; Handoko, A. D.; Chen, C. S.; Malkhandi, S.; Yeo, B. S., Selective Electrochemical Reduction of Carbon Dioxide to Ethylene and Ethanol on Copper(I) Oxide Catalysts. *ACS Catal.* **2015**, 5 (5), 2814-2821.
7. Handoko, A. D.; Ong, C. W.; Huang, Y.; Lee, Z. G.; Lin, L.; Panetti, G. B.; Yeo, B. S., Mechanistic Insights into the Selective Electroreduction of Carbon Dioxide to Ethylene on Cu<sub>2</sub>O-Derived Copper Catalysts. *J. Phys. Chem. C* **2016**, 120 (36), 20058-20067.
8. Chang, Z.; Huo, S.; Zhang, W.; Fang, J.; Wang, H., The tunable and highly selective reduction products on Ag@Cu bimetallic catalysts toward CO<sub>2</sub> electrochemical reduction reaction. *J. Phys. Chem. C* **2017**, 121 (21), 11368-11379.
9. Gurudayal; Bullock, J.; Sranko, D. F.; Towle, C. M.; Lum, Y.; Hettick, M.; Scott, M. C.; Javey, A.; Ager, J., Efficient solar-driven electrochemical CO<sub>2</sub> reduction to hydrocarbons and oxygenates. *Energy Environ. Sci.* **2017**, 10 (10), 2222-2230.
10. Lee, S.; Park, G.; Lee, J., Importance of Ag–Cu Biphasic Boundaries for Selective Electrochemical Reduction of CO<sub>2</sub> to Ethanol. *ACS Catal.* **2017**, 7 (12), 8594-8604.
11. Hoang, T. T. H.; Verma, S.; Ma, S.; Fister, T. T.; Timoshenko, J.; Frenkel, A. I.; Kenis, P. J. A.; Gewirth, A. A., Nanoporous Copper–Silver Alloys by Additive-Controlled Electrodeposition for the Selective Electroreduction of CO<sub>2</sub> to Ethylene and Ethanol. *J. Am. Chem. Soc.* **2018**, 140 (17), 5791-5797.
12. Gao, J.; Ren, D.; Guo, X.; Zakeeruddin, S. M.; Grätzel, M., Sequential Catalysis Enables Enhanced C-C Coupling towards Multicarbon Alkenes and Alcohols in Carbon Dioxide Reduction: A Study on CuAu Electrocatalysts. *Faraday Discuss.* **2019**, 215, 282-296.

13. Yano, H.; Tanaka, T.; Nakayama, M.; Ogura, K., Selective Electrochemical Reduction of CO<sub>2</sub> to Ethylene at a Three-phase Interface on Copper (I) Halide-Confined Cu-mesh Electrodes in Acidic Solutions of Potassium Halides. *J. Electroanal. Chem.* **2004**, 565 (2), 287-293.
14. Hsieh, Y.-C.; Senanayake, S. D.; Zhang, Y.; Xu, W.; Polyansky, D. E., Effect of chloride anions on the synthesis and enhanced catalytic activity of silver nanocoral electrodes for CO<sub>2</sub> electroreduction. *ACS Catal.* **2015**, 5 (9), 5349-5356.
15. Schreier, M.; Héroguel, F.; Steier, L.; Ahmad, S.; Luterbacher, J. S.; Mayer, M. T.; Luo, J.; Grätzel, M., Solar conversion of CO<sub>2</sub> to CO using Earth-abundant electrocatalysts prepared by atomic layer modification of CuO. *Nat. Energy* **2017**, 2, 17087.
16. Schreier, M.; Curvat, L.; Giordano, F.; Steier, L.; Abate, A.; Zakeeruddin, S. M.; Luo, J.; Mayer, M. T.; Grätzel, M., Efficient Photosynthesis of Carbon Monoxide from CO<sub>2</sub> Using Perovskite Photovoltaics. *Nat. Commun.* **2015**, 6, 7326.
17. Asadi, M.; Kim, K.; Liu, C.; Addepalli, A. V.; Abbasi, P.; Yasaei, P.; Phillips, P.; Behranginia, A.; Cerrato, J. M.; Haasch, R., Nanostructured Transition Metal Dichalcogenide Electrocatalysts for CO<sub>2</sub> Reduction in Ionic Liquid. *Science* **2016**, 353 (6298), 467-470.
18. Zhou, X.; Liu, R.; Sun, K.; Chen, Y.; Verlage, E.; Francis, S. A.; Lewis, N. S.; Xiang, C., Solar-Driven Reduction of 1 atm of CO<sub>2</sub> to Formate at 10% Energy-Conversion Efficiency by Use of a TiO<sub>2</sub>-Protected III–V Tandem Photoanode in Conjunction with a Bipolar Membrane and a Pd/C Cathode. *ACS Energy Lett.* **2016**, 1 (4), 764-770.
19. Arai, T.; Sato, S.; Morikawa, T., A Monolithic Device for CO<sub>2</sub> Photoreduction to Generate Liquid Organic Substances in a Single-Compartment Reactor. *Energy Environ. Sci.* **2015**, 8 (7), 1998-2002.
20. Ren, D.; Loo, N. W. X.; Gong, L.; Yeo, B. S., Continuous Production of Ethylene from Carbon Dioxide and Water Using Intermittent Sunlight. *ACS Sustainable Chem. Eng.* **2017**, 5 (10), 9191-9199.
21. Huan, T. N.; Dalla Corte, D. A.; Lamaison, S.; Karapinar, D.; Lutz, L.; Menguy, N.; Foldyna, M.; Turren-Cruz, S. H.; Hagfeldt, A.; Bella, F.; Fontecave, M.; Mougél, V., Low-cost high-efficiency system for solar-driven conversion of CO<sub>2</sub> to hydrocarbons. *Proc. Natl. Acad. Sci. U. S. A.* **2019**, 116 (20), 9735-9740.
